# Supplementary material
Source: publisher figshare collection journal article supplement (https://tandf.figshare.com/ndownloader/files/9686581)
Supplement: Supplementary file 1 [file 9686581]

## SUPPLEMENTARY MATERIAL

### Antioxidant activity and cholinesterase inhibition studies of four flavouring herbs from Alentejo

Sílvia Arantes<sup>(1,2,3)</sup>, Andreia Piçarra<sup>(1,2)</sup>, Fátima Candeias<sup>(1,3)</sup>, Dora Teixeira<sup>(1,2)</sup>, A. Teresa Caldeira<sup>(1,2)</sup> and M. Rosário Martins<sup>(1,2)\*</sup>

<sup>(1)</sup> Departamento de Química, Escola de Ciências e Tecnologia, Universidade de Évora, R. Romão Ramalho 59, Colégio Luis António Verney, 7000-671 Évora, Portugal

<sup>(2)</sup> Laboratório HERCULES, Universidade de Évora, Largo Marquês de Marialva 8, 7000-809 Évora, Portugal

<sup>(3)</sup> ICAAM, Instituto de Ciências Agrárias e Ambientais Mediterrânicas, Universidade de Évora, Apartado 94, 7006-554 Évora, Portugal

\* Corresponding author: mrm@uevora.pt

#### Abstract

Essential oils (EOs) and aqueous extracts of aerial parts of four aromatic species, *Calamintha nepeta*, *Foeniculum vulgare*, *Mentha spicata* and *Thymus mastichina*, from southwest of Portugal were characterized chemically and analysed in order to evaluate their antioxidant potential and cholinesterase inhibitory activities. The main components of EOs were oxygenated monoterpenes, and aqueous extracts were rich in phenol and flavonoid compounds. EOs and aqueous extracts presented a high antioxidant potential, with ability to protect the lipid substrate, free radical scavenging and iron reducing power. Furthermore, EOs and extracts showed AChE and BChE inhibitory activities higher than rivastigmine, the standard drug. Results suggested the potential use of EOs and aqueous extracts of these flavouring herbs as nutraceutical or pharmaceutical preparations to minimize the oxidative stress and the progression of degenerative diseases.

#### Keywords

Essential oils, Aqueous extracts, Aromatic herbs, Antioxidant, Cholinesterase inhibition, Alzheimer's Disease

## 1. Experimental

### 1.1. Chemicals

Analytical standards for chromatography (> 99%) were purchased from Sigma-Aldrich (St. Louis, USA) and Extrasynthese (Genay, France). Quercetin (> 99%), 2,2-diphenyl-1-picryl-hydrazyl (DPPH) (95%),  $\beta$ -carotene (95%), linoleic acid (99%), acetylcholinesterase (AChE) type VI-S-electric eel, 5,5'-dithiobis[2-nitrobenzoic acid] (DTNB), acetylthiocholine iodide (ATCI), butyrylthiocholine iodide (BTCI) and equine serum butyrylcholinesterase (BChE) were purchased from Sigma-Aldrich (St. Louis, MO, USA). All other chemicals and solvents were high purity grade and purchased from Sigma-Aldrich (St. Louis, MO, USA) and Merck (Darmstadt, Germany).

### 1.2. Plant material

Wild grown *F. vulgare* (leaves), *M. spicata* (leaves), *T. mastichina* (leaves and flowers) and *C. nepeta* (leaves and flowers) were collected in Évora region and deposited at the herbarium of Aromatic Plants of the University of Évora, with the accession numbers of HPAMT\_UE 000003, HPAMT\_UE 000001, HPAMT\_UE 000010 and HPAMT\_UE 000006, respectively. Voucher specimens were identified by Professor Marízia Menezes (University of Évora).

### 1.3. Extraction of essential oils and aqueous extracts

Essential oils were obtained by hydrodistillation of aerial part of the plants during 3 h, using a Clevenger-type apparatus, according to the European Pharmacopoeia (COE 2007). The refractive index of EOs was measured using a refractometer (Leica Abbe Mark II, Model 10481). Aqueous extracts were obtained from decoction waters.

### 1.4. Chemical characterisation of essential oils

The characterisation of EOs was performed by gas chromatography with a flame ionization detector (GC-FID) on a HP-5890 SERIES II equipped with a 30 m x 0.25 mm i.d., film thickness 0.25  $\mu$ m Supelcowax<sup>TM</sup>10 fused-silica polar capillary column (Supelco, Milford, USA) and a ChemStation HP software, version A.04.02. GC-MS analyses were performed with a GC-MS-QP2010 Series (Shimadzu) gas chromatograph, fitted with a DB-WAX column 30 m x 0.25 mm i.d., film thickness 0.25  $\mu$ m, interfaced with a detector model Polaris Q (E. I. quadrupole).

Experiments were conducted under the conditions described by Arantes et al. (2016). Compounds were identified based on their retention indices and their mass spectra of NIST08 (*National Institute of Standards and Technology*) library. Retention indices were determined by interpolation relative to the retention time of C8–C22 *n*-alkanes and they were compared with those of authentic standards and literature data (Cavaleiro et al. 2004, Mottram 2007). Quantitative data of individual components of EO were determined using relative percentage abundance and a normalization method without the use of

response factors for flame ionisation detection. Percentage values are the mean of peak areas of three injections per sample.

### ***1.5. Chemical analysis of aqueous extracts***

#### ***1.5.1. Phytochemical screening***

Phytochemical tests to detect the presence of heterosides, saponins, tannins, flavonoids, steroids, triterpenes, coumarins, quinones, organic acids and alkaloids were performed according to the method described by Anyasor et al. (2010).

#### ***1.5.2. Total phenol content***

Quantitative determination of total phenols content of aqueous extracts was performed using the Folin-Ciocalteu method, based on the reaction of the reagent with the functional hydroxyl groups of phenols. Aliquots of 5  $\mu\text{L}$  of extract (17–133  $\mu\text{g/mL}$ ) were diluted with 235  $\mu\text{L}$  of water and added with 15  $\mu\text{L}$  of Folin-Ciocalteu's phenol reagent. After 5 min incubation, 45  $\mu\text{L}$  of saturated  $\text{NaCO}_3$  solution was added and samples were incubated for 30 min at 40  $^{\circ}\text{C}$ . The absorbance was measured at 630 nm versus a blank sample, in a microplate spectrophotometer (Thermo Scientific, Finland).mixed. Gallic acid (0.2–9.0  $\mu\text{g/mL}$ ) was used as standard.

#### ***1.5.3. Total flavonoid content***

Total flavonoid content of aqueous extracts was determined according to the colorimetric method of Deng et al. (2012), with some modifications. Briefly, 100  $\mu\text{L}$  of diluted extracts (500–4000  $\mu\text{g/mL}$ ) were added to equal volumes of  $\text{AlCl}_3\cdot\text{H}_2\text{O}$  solution 2% (w/v). The solution was shaken and incubated at room temperature for 10 min. A blank assay was prepared adding distilled water to samples. The absorbance was measured at 490 nm using a microplate spectrophotometer. Quercetin was used as standard in a concentration range of 25–500  $\mu\text{g/mL}$ .

### ***1.6. Antioxidant activity***

#### ***1.6.1. DPPH radical scavenging assay***

Free radical scavenging activity was determined by measuring the bleaching of a purple-coloured solution of the stable radical 2,2-diphenyl-1-picryl-hydrazyl (DPPH $\bullet$ ). This method evaluates the ability of EO to act as donor of hydrogen atoms or electrons in transformation of DPPH $\bullet$  into its reduced form DPPH-H. Antioxidant activity of EOs (0.4–32.6  $\text{mg/mL}$ ), ascorbic acid (0.25–65.0  $\mu\text{g/mL}$ ) and quercetin (0.42–13.04  $\mu\text{g/mL}$ ) was performed according to by Tepe et al. (2007), with some modifications. In 96 wells microplates, 30  $\mu\text{L}$  of each EO ethanol solution was added to 200  $\mu\text{L}$  of DPPH ethanol solution 0.1 mM. A control sample using solvent was prepared. After incubation at room temperature, in the dark, absorbance at 517 nm was measured periodically during 180 min, using a

microplate spectrophotometer (Thermo Scientific, Finland) (Arantes et al. 2016). Inhibition of free radical by DPPH in percentage (I%) was calculated using the equation:

$I (\%) = [(AC-AS)/AC] \times 100$ , where AC is the absorbance of the control and AS is the absorbance of the sample.

#### *1.6.2. $\beta$ -Carotene/linoleic acid bleaching method*

Bleaching  $\beta$ -carotene/linoleic acid antioxidant capacity is determined measuring the inhibition of the volatile organic compounds and the conjugated diene hydroperoxides arising from linoleic acid oxidation (Tepe et al. 2007). Antioxidant activity of EO (0.04–2.50 mg/mL), ascorbic acid (0.06–4.00 mg/mL) and quercetin (0.8–24.56  $\mu$ g/mL) was determined measuring the absorbance at 490 nm at minute zero and after 2 h incubation in a water bath at 50°C, using a microplate spectrophotometer (Thermo Scientific).

Lipid peroxidation (LPO) inhibition was calculated using the following equation:

$$LPO (\%) = [(\Delta A_C - \Delta A_S) / \Delta A_C] \times 100,$$

where  $\Delta A_C$  is the difference between absorbance at 0 h and 2 h for the control and  $\Delta A_S$  is the difference between absorbance at 0 h and 2 h for samples or standards.

#### *1.6.3. Reducing power assay*

Reducing power of EOs was determined according Ferreira et al. 2007, with some modifications. In microtubes, 200  $\mu$ L of EOs ethanol solutions (0.4–60.0 mg/mL) were added to 50  $\mu$ L of sample solvent, 200  $\mu$ L of phosphate buffer (0.2M, pH 6.6) and 200  $\mu$ L of potassium ferrocyanide (1%). Solutions were mixed and incubated at 50°C for 20 min. 200  $\mu$ L of trichloroacetic acid (10%) was added, solutions were incubated during 2 min. and centrifuged (3000 rpm, 10 min). 50  $\mu$ L of the supernatant was added with 50  $\mu$ L distilled water and 100  $\mu$ L  $FeCl_3$  (0.1%). The absorbance was measured at 630 nm and compared with standards, quercetin and ascorbic acid.

### **1.7. In vitro inhibition studies for AChE and BChE**

AChE and BChE inhibitory activities were determined using a modified Ellman's microassay method described by Ingkaninan et al. (2003), with modifications. In a total volume of 250  $\mu$ L, 75  $\mu$ L of samples (ethanol for EOs or buffer solution for extracts) in Tris-HCl buffer 0.1 M (pH 8) with different concentrations were added to 25  $\mu$ L of 15 mM ATCI/ BTCl solutions, 125  $\mu$ L of 3 mM DTNB in Tris-HCl buffer 50 mM, and 25  $\mu$ L of enzyme solution containing 0.3 U/mL. Rivastigmine and galanthamine were used as a standard. The reactions were monitored for 20 min at 405 nm in a microplate spectrophotometer. Tests were carried out in triplicate. Sample concentrations providing 50% inhibition (IC<sub>50</sub>) were calculated from graphs plotted with I% values of the inhibition of AChE/ BChE versus the analysed concentrations, by nonlinear fit, using Origin 8.0 software (Microsoft Corporation).

## References

- Anyasor GN, Ogunwenmo KO, Oyelana OA, Akpofunure BE. 2010. Phytochemical constituents and antioxidant activities of aqueous and methanol stem extracts of *Costus afer* Ker Gawl. (*Costaceae*). Afr J Biotechnol.9:4880-4884.
- Arantes S, Candeias F, Lopes O, Lima M, Pereira M, Tinoco T, Cruz-Morais J, Martins MR. 2016. Pharmacological and toxicological studies of essential oil of *Lavandula stoechas* subsp . *luisieri*. Planta Med.82,1266-1273.
- Cavaleiro C, Salgueiro LR, Miguel MG, Proença da Cunha A. 2004. Analysis by gas chromatography-mass spectrometry of the volatile components of *Teucrium lusitanicum* and *Teucrium algarbiensis*. J Chromatogr A.1033:187-190.
- COE. 2007. European Pharmacopoeia, 6th edition Strasbourg: Council of Europe (COE).
- Deng JS, Chang YC, Wen CL, Liao JC, Hou WC, Amagaya S, Huang SS, Huang GJ. 2012. Hepatoprotective effect of the ethanol extract of *Vitis thunbergii* on carbon tetrachloride-induced acute hepatotoxicity in rats through anti-oxidative activities. J Ethnopharmacol.142:795-803.
- Gonçalves MJ, Vicente AM, Cavaleiro C, Salgueiro L. 2007. Composition and antifungal activity of the essential oil of *Mentha cervina* from Portugal. Nat Prod Res.21:867-871.
- Ferreira A, Proença C, Serralheiro MLM, Araújo MEM. 2006. The *in vitro* screening for acetylcholinesterase inhibition and antioxidant activity of medicinal plants from Portugal. J Ethnopharmacol.108:31-37.
- Ingkaninan K, Temkitthawon P, Chuenchom K, Yuyaem T, Thongnoi W. 2003. Screening for acetylcholinesterase inhibitory activity in plants used in Thai traditional rejuvenating and neurotonic remedies. J Ethnopharmacol.89:261-264.
- Machado M, Dinis AM, Salgueiro L, Cavaleiro C, Custodio JB, Sousa Mdo C. 2010. Anti-Giardia activity of phenolic-rich essential oils: effects of *Thymbra capitata*, *Origanum virens*, *Thymus zygis* subsp. *sylvestris*, and *Lippia graveolens* on trophozoites growth, viability, adherence, and ultrastructure. Parasitol Res.106:1205-1215.
- Marongiu B, Piras A, Porcedda S, Falconieri D, Maxia A, Goncalves MJ, Cavaleiro C, Salgueiro L. 2010. Chemical composition and biological assays of essential oils of *Calamintha nepeta* (L.) Savi subsp. *nepeta* (Lamiaceae). Nat Prod Res.24:1734-1742.
- Mottram R. 2007. The LRI and odour database 2007: Flavour Research Group, School of Food Biosciences, University of Reading, UK. Available from: <http://www.odour.org.uk/>.
- Tepe B, Sihoglu-Tepe A, Daferera D, Polissiou M, Sokmen A. 2007. Chemical composition and antioxidant activity of the essential oil of *Clinopodium vulgare* L. Food Chem.103:766-770.
- Zuzarte M, Goncalves MJ, Cavaleiro C, Dinis AM, Canhoto JM, Salgueiro LR. 2009. Chemical composition and antifungal activity of the essential oils of *Lavandula pedunculata* (Miller) Cav. Chem Biodivers.6:1283-1292.

## Captions

**Table S1.** Chemical composition of EOs of *C. nepeta*, *F. vulgare*, *M. spicata* and *T. mastichina*

**Figure S1.** Chemical characterization of aqueous extracts. Total phenol content (a); total flavonoid content (b). GAE – gallic acid equivalents. QE – quercetin equivalents.

**Table S1.** Chemical composition of EOs of *C. nepeta*, *F. vulgare*, *M. spicata* and *T. mastichina*

| Compound                   | RI <sub>exp</sub> <sup>a</sup> | RI <sub>ref</sub> | % Area <sup>g</sup> |                   |                   |                      | Id <sup>h</sup> |
|----------------------------|--------------------------------|-------------------|---------------------|-------------------|-------------------|----------------------|-----------------|
|                            |                                |                   | <i>C. nepeta</i>    | <i>F. vulgare</i> | <i>M. spicata</i> | <i>T. mastichina</i> |                 |
| $\alpha$ - pinene          | 1028                           | 1030 <sup>d</sup> | 2.0                 | 2.2               | 0.6               | -                    | AS, RI          |
| Camphene                   | 1071                           | 1073 <sup>d</sup> | 2.1                 | 0.3               | 0.7               | 1.5                  | AS, RI          |
| $\Delta^3$ -carene         | 1159                           | 1151 <sup>e</sup> | -                   | -                 | 0.6               | -                    | AS, RI          |
| $\beta$ - pinene           | 1116                           | 1116 <sup>d</sup> | 1.3                 | 0.8               | 0.9               | 3.3                  | AS, RI          |
| $\alpha$ -terpinene        | 1190                           | 1189 <sup>d</sup> | -                   | -                 | 5.1               | -                    | AS, RI          |
| $\alpha$ - phellandrene    | 1165                           | 1168 <sup>d</sup> | 1.2                 | 4.9               | -                 | -                    | AS, RI, NIST    |
| Myrcene                    | 1169                           | 1162 <sup>d</sup> | -                   | 5.1               | -                 | -                    | AS, RI, NIST    |
| Limonene                   | 1209                           | 1205 <sup>d</sup> | -                   | 6.0               | 1.1               | -                    | AS, RI, NIST    |
| 1,8-cineole                | 1217                           | 1215 <sup>d</sup> | 18.3                | 1.2               | -                 | 72.0                 | AS, RI, NIST    |
| $\beta$ -o-cimene          | 1234                           | 1235 <sup>d</sup> | 0.2                 | -                 | 2.5               | -                    | AS, RI, NIST    |
| $\gamma$ -terpinene        | 1253                           | 1251 <sup>d</sup> | 0.1                 | 0.2               | 1.5               | 0.6                  | AS, RI, NIST    |
| Sabinene hydrate           | 1464                           | 1464 <sup>b</sup> | 1.5                 | -                 | -                 | -                    | AS, RI          |
| $p$ -Cymene                | 1275                           | 1273 <sup>d</sup> | -                   | 1.7               | -                 | -                    | AS, RI          |
| $\alpha$ -Terpinolene      | 1290                           | 1288 <sup>b</sup> | -                   | 0.4               | -                 | -                    | AS, RI          |
| Fenchone                   | 1400                           | 1400 <sup>f</sup> | -                   | 20.2              | -                 | -                    | AS, RI          |
| Menthone                   | 1465                           | 1461 <sup>b</sup> | 1.6                 | -                 | -                 | -                    | AS, RI, NIST    |
| Isomenthone                | 1490                           | 1491 <sup>b</sup> | 0.6                 | -                 | 4.0               | -                    | AS, RI, NIST    |
| Linalool                   | 1542                           | 1542 <sup>d</sup> | -                   | -                 | -                 | 2.0                  | AS, RI          |
| Isopulegol                 | 1562                           | 1557 <sup>c</sup> | 22.6                | -                 | -                 | -                    | AS, RI, NIST    |
| Isopulegone                | 1575                           | 1570 <sup>b</sup> | 20.5                | -                 | -                 | -                    | AS, RI, NIST    |
| $\beta$ - caryophyllene    | 1600                           | 1594 <sup>b</sup> | 3.6                 | 0.1               | 2.9               | -                    | AS, RI, NIST    |
| 4-terpineol                | 1606                           | 1599 <sup>b</sup> | 6.7                 | -                 | -                 | 1.4                  | AS, RI, NIST    |
| Menthol                    | 1645                           | 1635 <sup>b</sup> | 5.1                 | -                 | -                 | -                    | AS, RI, NIST    |
| <i>trans</i> -pinocarveol  | 1659                           | 1649 <sup>d</sup> | 2.1                 | -                 | -                 | -                    | AS, RI          |
| Pulegone                   | 1643                           | 1640 <sup>b</sup> | 8.6                 | -                 | -                 | -                    | AS, RI          |
| <i>iso</i> -borneol        | 1670                           | 1665 <sup>d</sup> | -                   | -                 | -                 | 2.7                  | AS, RI          |
| Estragol                   | 1688                           | -                 | 0.7                 | 6.2               | 7.5               | -                    | AS, NIST        |
| Terpenyl acetate           | 1700                           | 1692 <sup>d</sup> | 0.3                 | -                 | 1.5               | -                    | AS, RI          |
| $\alpha$ -terpineol        | 1703                           | 1692 <sup>d</sup> | 0.4                 | -                 | 21.5              | 9.0                  | AS, RI          |
| Carvone                    | 1729                           | 1727 <sup>d</sup> | -                   | -                 | 45.0              | 0.8                  | AS, RI, NIST    |
| Anethole                   | 1847                           | -                 | -                   | 46.2              | -                 | -                    | AS, NIST        |
| Geranyl acetate            | 1766                           | -                 | -                   | -                 | 1.1               | -                    | AS              |
| $\alpha$ -humelene         | 1704                           | 1662 <sup>d</sup> | -                   | -                 | 2.4               | -                    | AS, RI          |
| Caryophyllene oxide        | 2016                           | 1969 <sup>d</sup> | -                   | 0.5               | -                 | -                    | AS, RI, NIST    |
| Carvacrol                  | 2207                           | 2206 <sup>e</sup> | -                   | -                 | -                 | 2.8                  | AS, RI          |
| <b>Total identified</b>    |                                |                   | 99.5                | 96.0              | 98.9              | 96.1                 |                 |
| Hydrocarbon monoterpenes   |                                |                   | 6.9                 | 21.6              | 13.0              | 5.4                  |                 |
| Oxygenated monoterpenes    |                                |                   | 89.0                | 73.8              | 80.6              | 90.7                 |                 |
| Hydrocarbon sesquiterpenes |                                |                   | -                   | -                 | 2.4               | -                    |                 |
| Oxygenated sesquiterpenes  |                                |                   | -                   | 0.5               | -                 | -                    |                 |

Values are mean  $\pm$  standard deviation of triplicate analyses.

<sup>a</sup> Retention indices relative to C8 - C22 n-alkanes on the Supelcowax<sup>TM</sup>10 column.

<sup>b</sup> Retention indices reported by Gonçalves et al. (2007).

<sup>c</sup> Retention indices reported by Marongiu et al. (2010).

<sup>d</sup> Retention indices reported by Cavaleiro et al. (2004).

<sup>e</sup> Retention indices reported by Machado et al. (2010).

<sup>f</sup> Retention indices reported by Zuzarte et al. (2009).

<sup>g</sup> Relative quantitative data by GC-FID analysis.

<sup>h</sup> Id - Identification method: AS - Identification by adding standard, RI - Identification by the retention indices, NIST - Identification by mass spectrometry library (NIST).

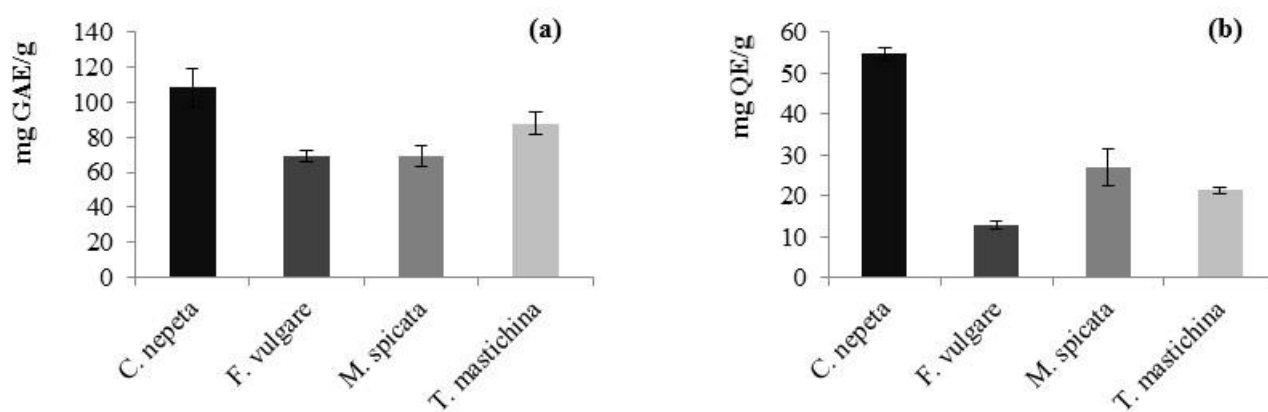

**Figure S1.** Chemical characterization of aqueous extracts. Total phenol content (a), total flavonoid content (b). GAE – gallic acid equivalents. QE – quercetin equivalents.
